# Supplementary material
Source: PubMed Central journal article supplement (PMC7837685)
Supplement: atv-41-878-s001.pdf [file atv-41-878-s001.pdf]

## Major Resources Table

**COVID-19 patients have elevated levels of circulating extracellular vesicle tissue factor activity that is associated with severity and mortality**

In order to allow validation and replication of experiments, all essential research materials listed in the Methods should be included in the Major Resources Table below. Authors are encouraged to use public repositories for protocols, data, code, and other materials and provide persistent identifiers and/or links to repositories when available. Authors may add or delete rows as needed.

### Antibodies

| Target antigen           | Vendor or Source | Catalog # | Working concentration | Lot # (preferred but not required) | Persistent ID / URL |
|--------------------------|------------------|-----------|-----------------------|------------------------------------|---------------------|
| Anti - human TF antibody | BD biosciences   | 550252    | 7.8 µg/mL             |                                    | HTF-1               |
| Control mouse IgG        | Sigma-Aldrich    | 15381     | 7.8 µg/mL             |                                    | 15381               |

### Data & Code Availability

| Description                                   | Source / Repository  | Persistent ID / URL |
|-----------------------------------------------|----------------------|---------------------|
| Original data available on reasonable request | Corresponding author |                     |

### Other

| Description                  | Source / Repository  | Persistent ID / URL |
|------------------------------|----------------------|---------------------|
| Innovin                      | Dade Behring         | 10873566            |
| FX                           | Enzyme Research Labs | HFX 1010            |
| FVIIa                        | Enzyme Research Labs | HFVIIa              |
| Pefachrome FXa 8595 (S-2765) | Enzyme Research Labs | 085-27              |
